# Supplementary material for: Novel recognition mechanism based on oxidative addition of Pt(ii) complex-based luminescent probes for hypochlorite ion detection
Source: Royal Society of Chemistry journal article supplement (doi:10.1039/d1an01048d), 2021-01-01
Supplement: d1an01048d1.pdf [file d1an01048d1.pdf]

## **Novel recognition mechanism based on oxidative addition of Pt(II) complex-based luminescent probes for hypochlorite ion detection**

Jingjie Tang,<sup>a,d</sup> Guoxun Zhu,<sup>c</sup> Peng Li,<sup>a,d</sup> Pingjun Zhang,<sup>a,d</sup> Fang Peng,<sup>\*b</sup> Fei Meng<sup>\*a,d</sup>

<sup>a</sup>. Institute of Bioengineering, Guangdong Academy of Sciences, Guangzhou 510316, China.

<sup>b</sup>. Guangdong Second Provincial General Hospital, Guangzhou 510316, China.

<sup>c</sup>. School of Chemical Engineering and Technology, Sun Yat-sen University, Guangzhou 510275, China

<sup>d</sup>. Guangdong Province Engineering Research Center for Green Technology of Sugar Industry, Guangzhou  
510316, China.

## Table of content

|                                                                                                                                                                         |     |
|-------------------------------------------------------------------------------------------------------------------------------------------------------------------------|-----|
| Figure S1: $^1\text{H}$ NMR, $^{13}\text{C}$ NMR and ESI-MS spectra of intermediates <b>2</b> .....                                                                     | S3  |
| Figure S2: $^1\text{H}$ NMR, $^{13}\text{C}$ NMR and ESI-MS spectra of intermediates <b>4</b> .....                                                                     | S4  |
| Figure S3: $^1\text{H}$ NMR, $^{13}\text{C}$ NMR and ESI-HRMS spectra of intermediates <b>5</b> .....                                                                   | S6  |
| Figure S4: $^1\text{H}$ NMR, $^{13}\text{C}$ NMR and ESI-HRMS spectra of <b>Pt-H</b> .....                                                                              | S7  |
| Figure S5: $^1\text{H}$ NMR, $^{13}\text{C}$ NMR and ESI-HRMS spectra of <b>Pt-COOH</b> .....                                                                           | S9  |
| Figure S6: Absorption spectra in DMSO and cyclic voltammograms in 0.1 M <i>n</i> -NBu <sub>4</sub> PF <sub>6</sub> solutions in DMSO at the scan rates of 100 mV/s..... | S10 |
| Figure S7: Bright, luminescence, and merged photos of RAW264.7 cells treated with different concentrations of <b>Pt-H</b> .....                                         | S11 |
| Table S1: Electrochemical data of the probes.....                                                                                                                       | S11 |
| Table S2: The structure coordinates of the probes and the oxidative products.....                                                                                       | S12 |
| Table S3: The excited states analysis of the probes and the oxidative products.....                                                                                     | S25 |

Fig. S1  $^1\text{H}$  NMR,  $^{13}\text{C}$  NMR and ESI-MS spectra of intermediates **2**.

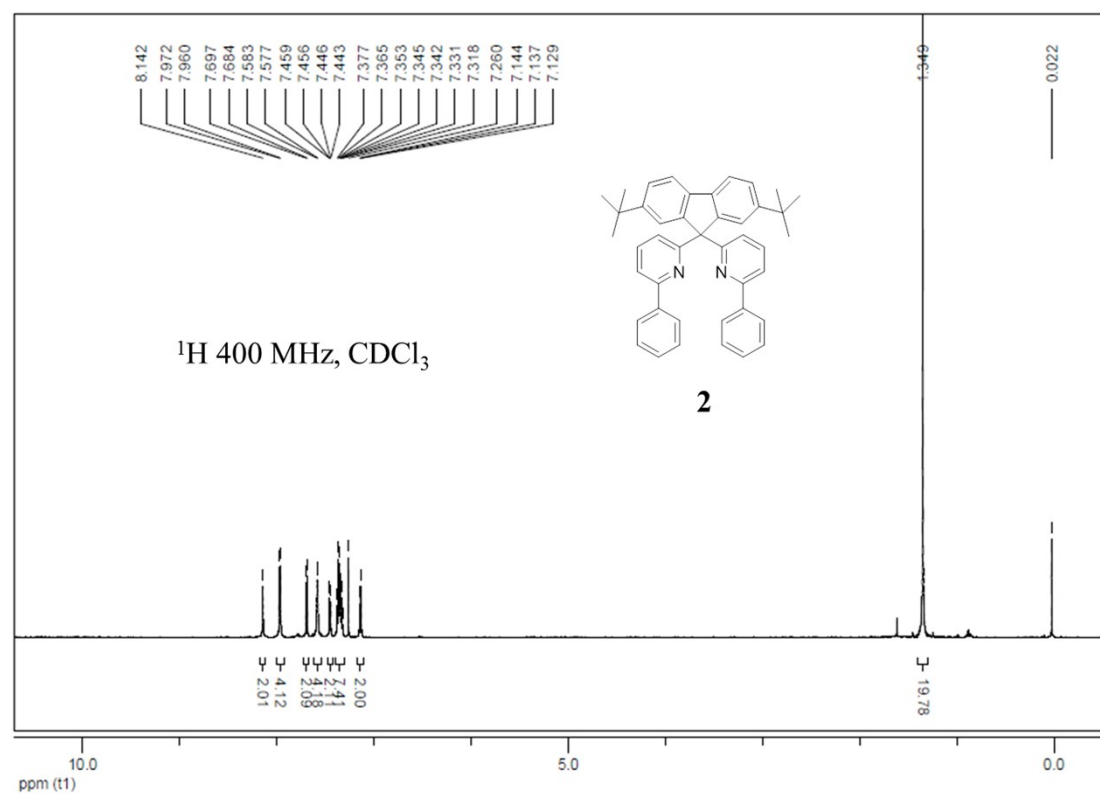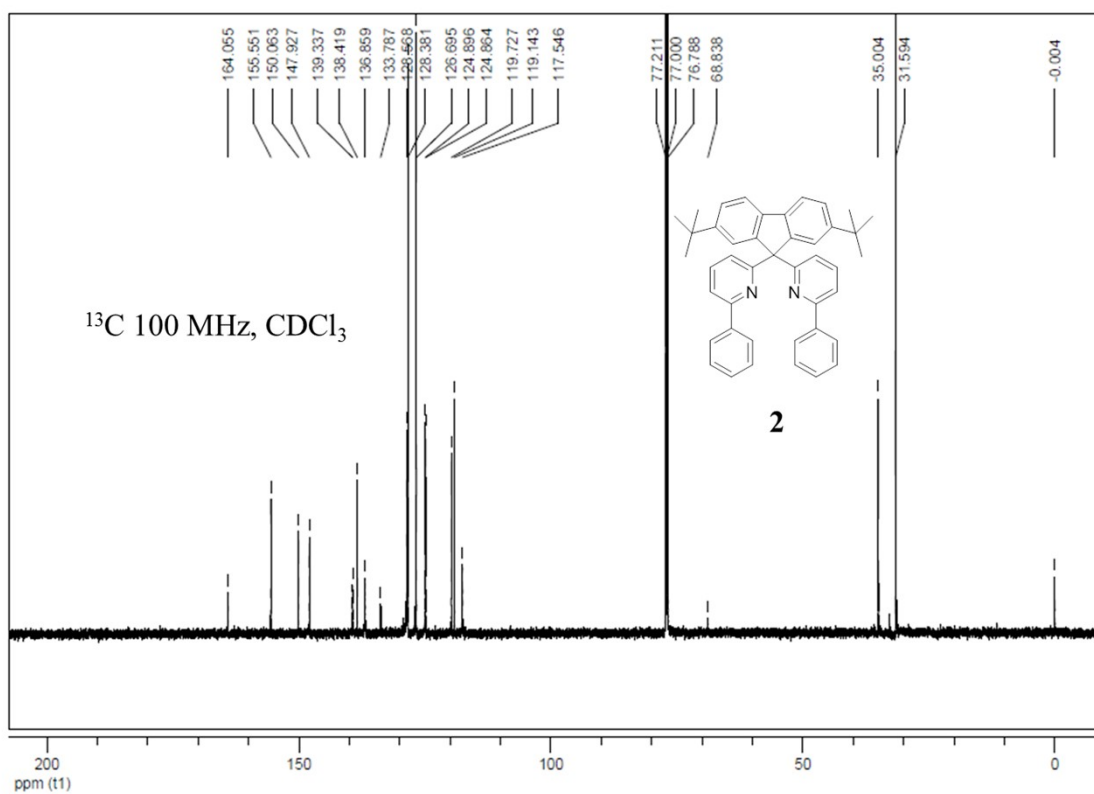

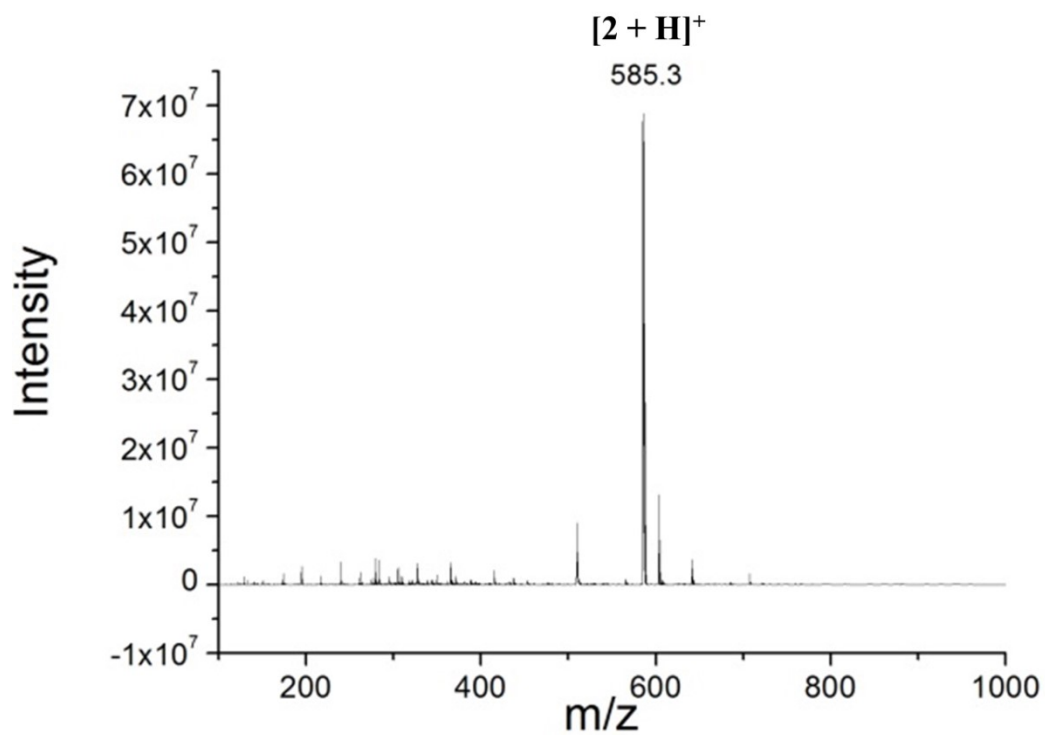

Fig. S2  $^1\text{H}$  NMR,  $^{13}\text{C}$  NMR and ESI-MS spectra of intermediates 4.

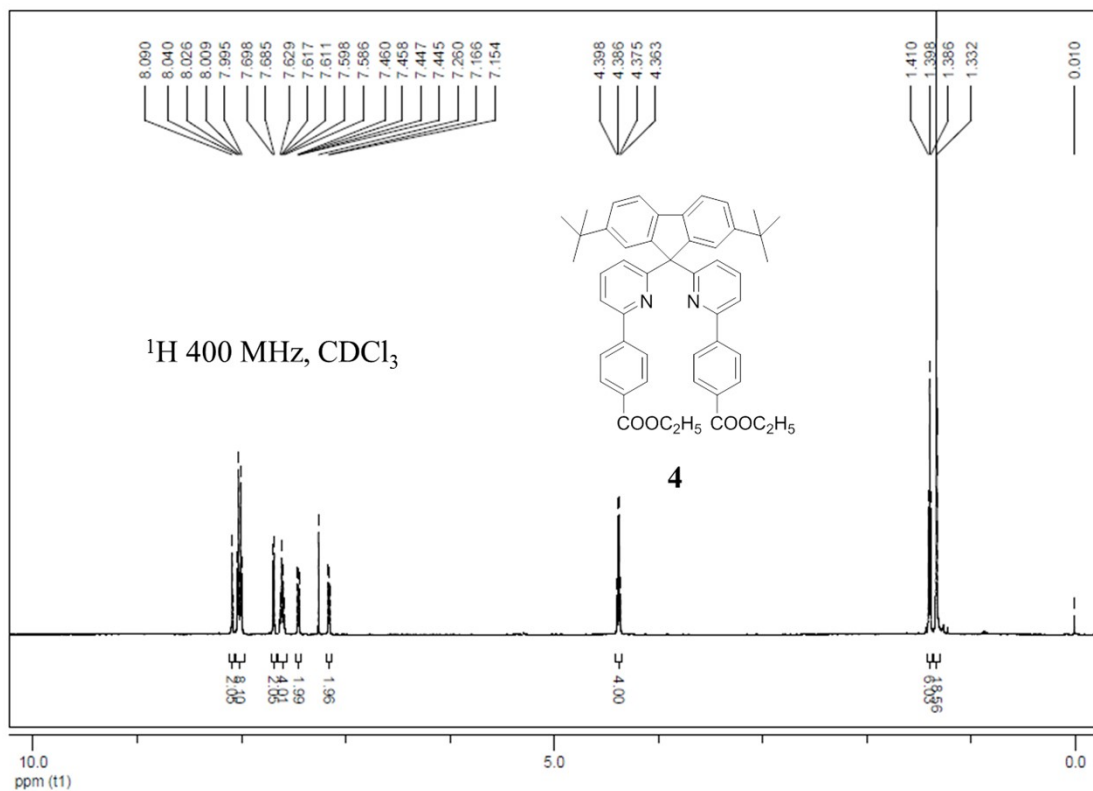

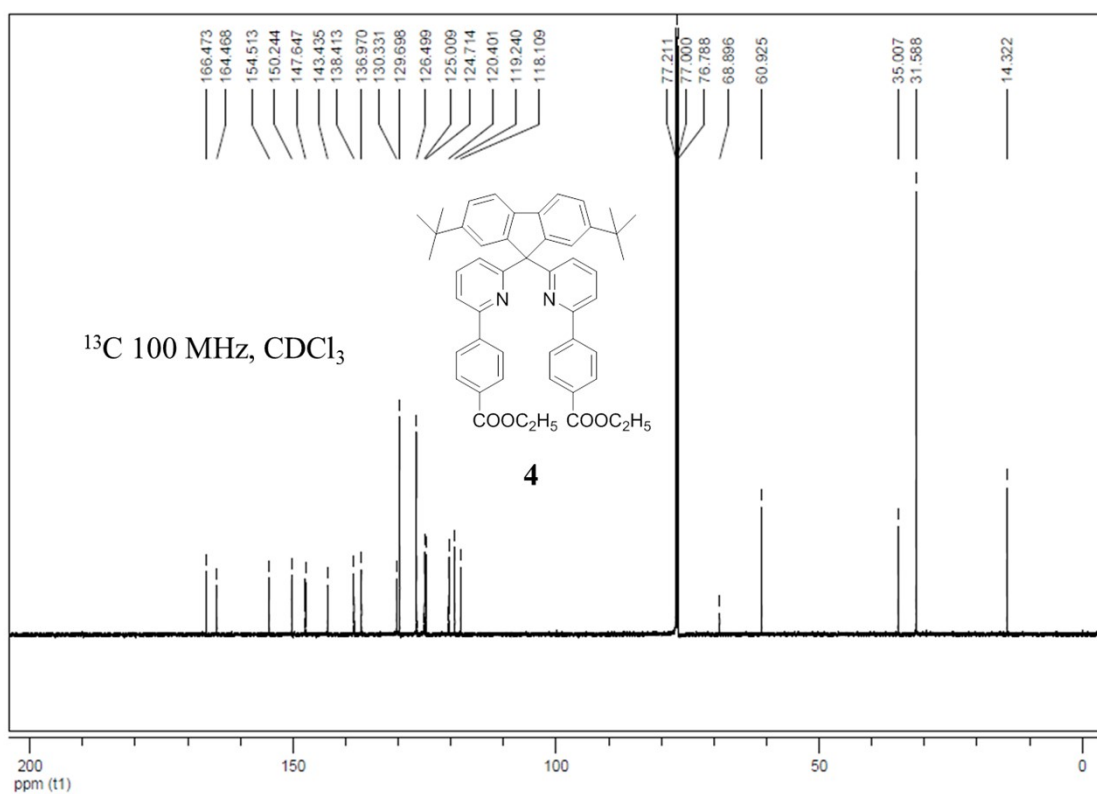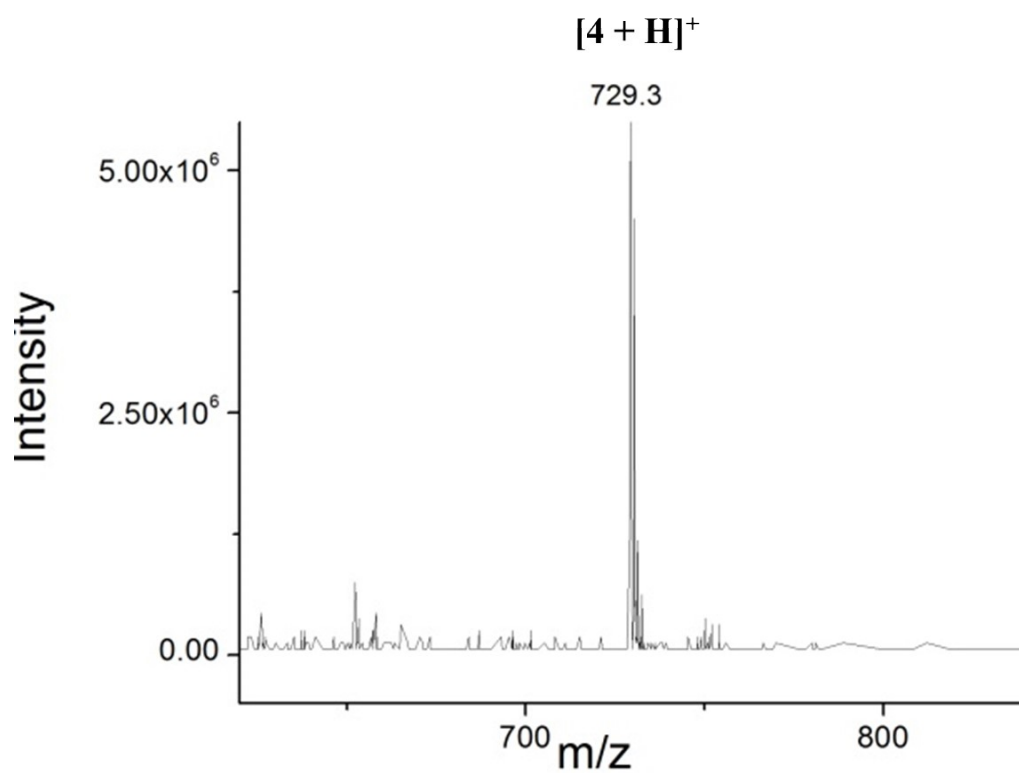

Fig. S3  $^1\text{H}$  NMR,  $^{13}\text{C}$  NMR and ESI-MS spectra of intermediates **5**.

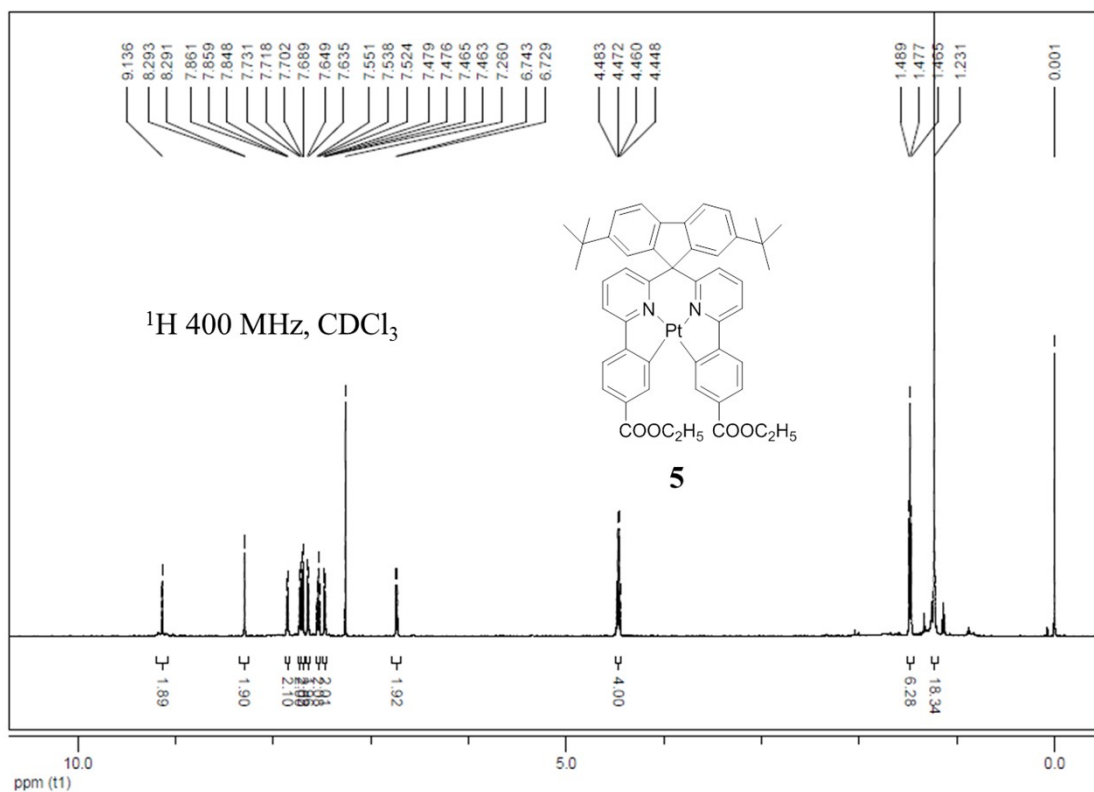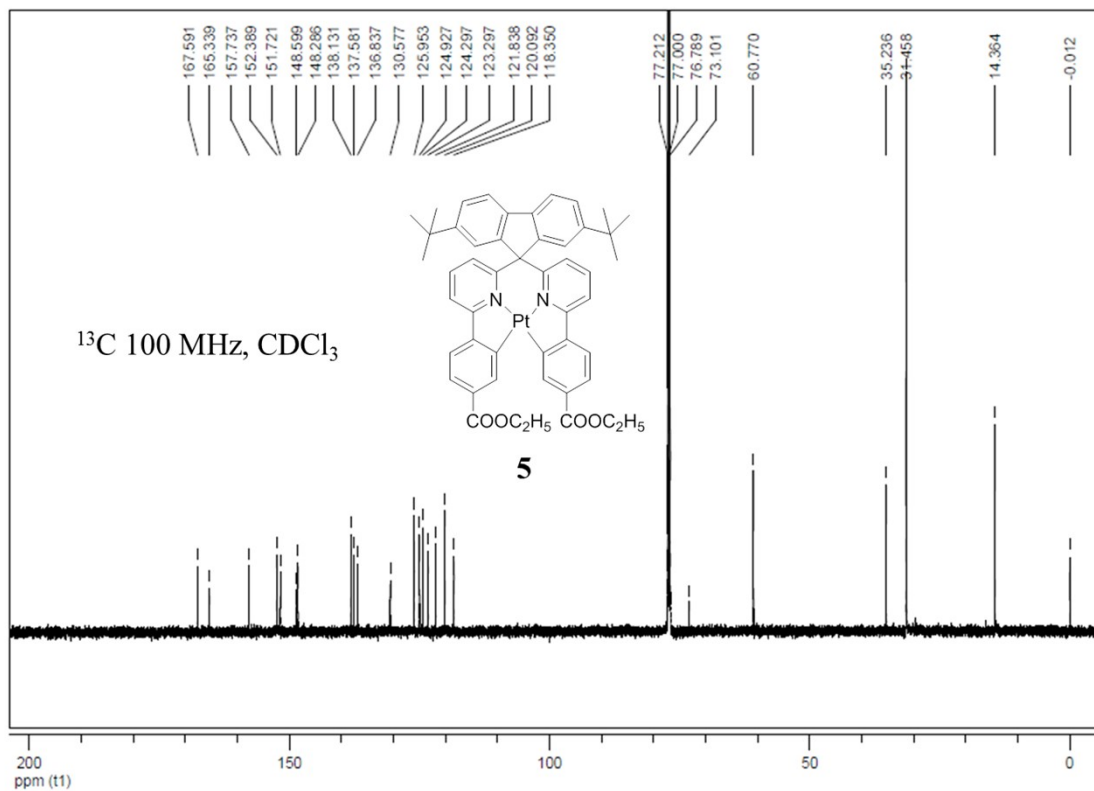

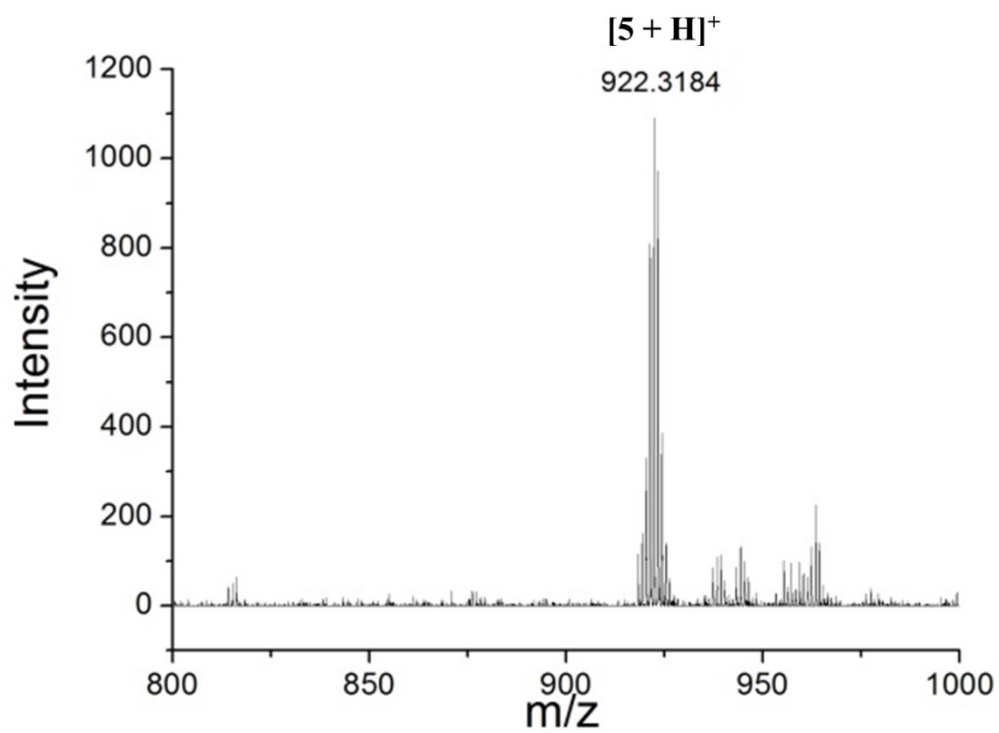

Fig. S4  $^1\text{H}$  NMR,  $^{13}\text{C}$  NMR and ESI-HRMS spectra of **Pt-H**.

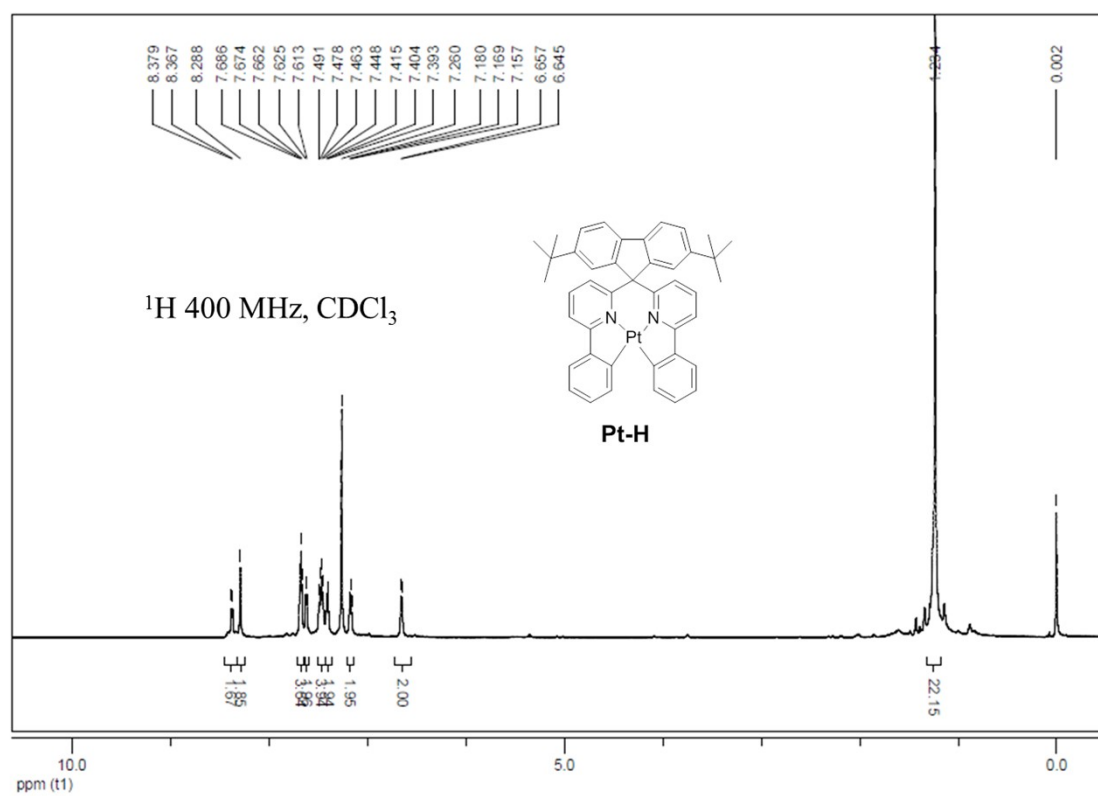

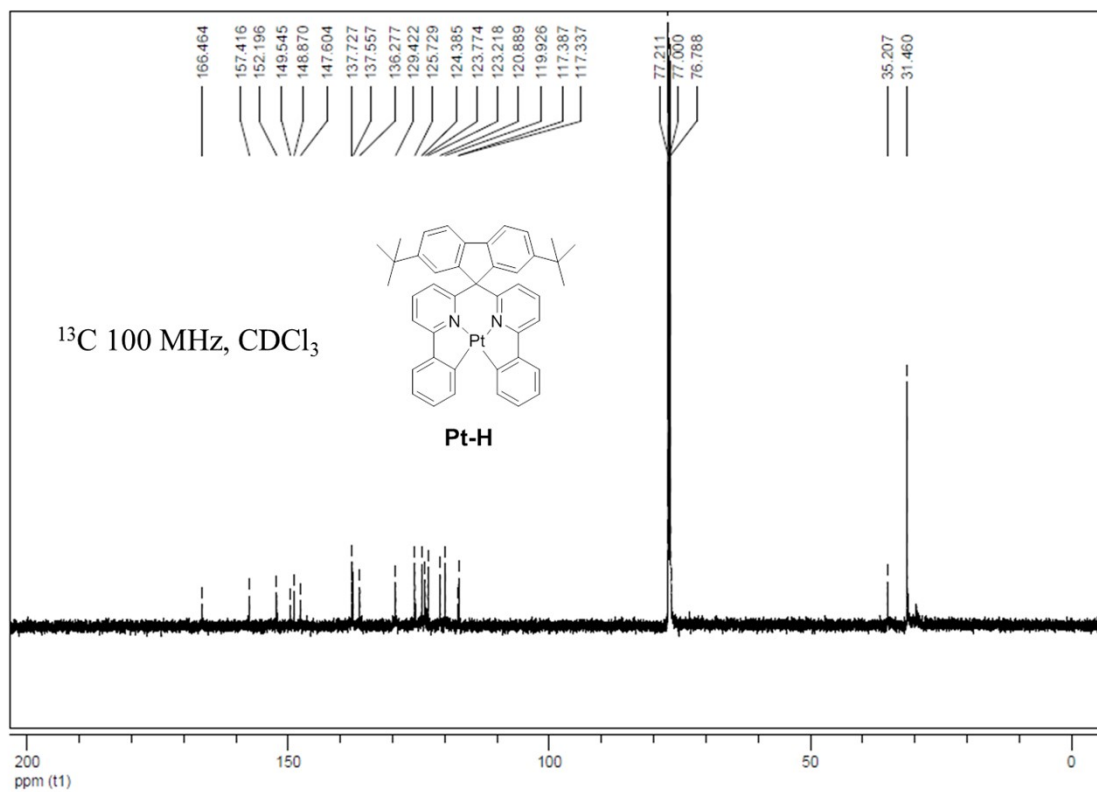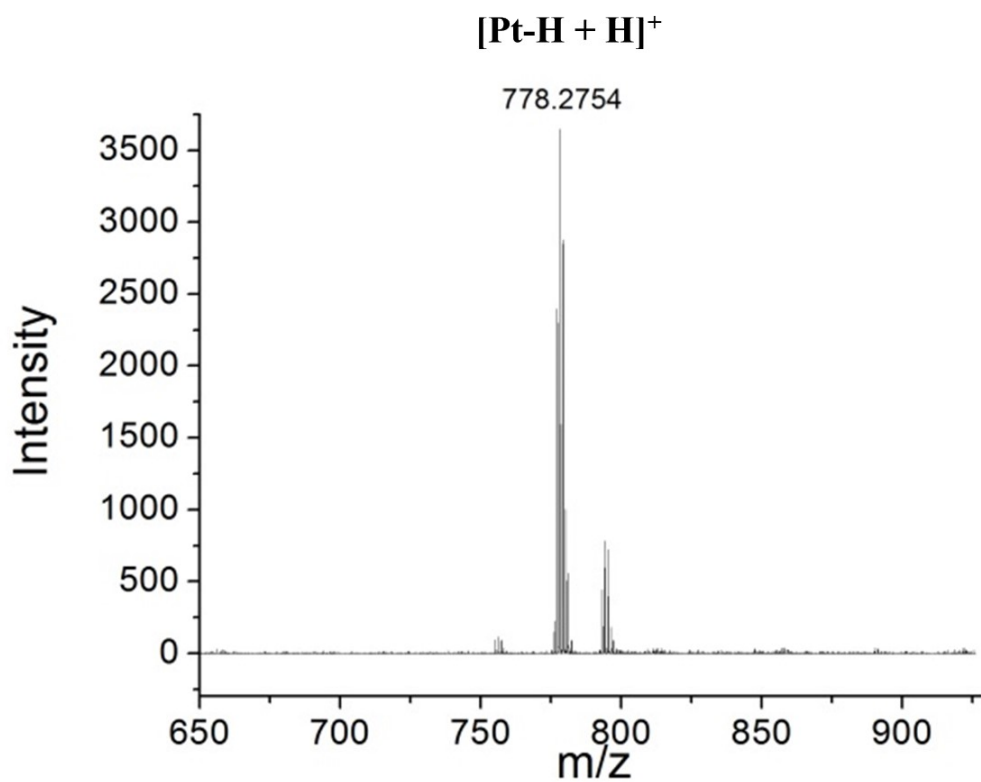



Fig. S5  $^1\text{H}$  NMR,  $^{13}\text{C}$  NMR and ESI-HRMS spectra of **Pt-COOH**.

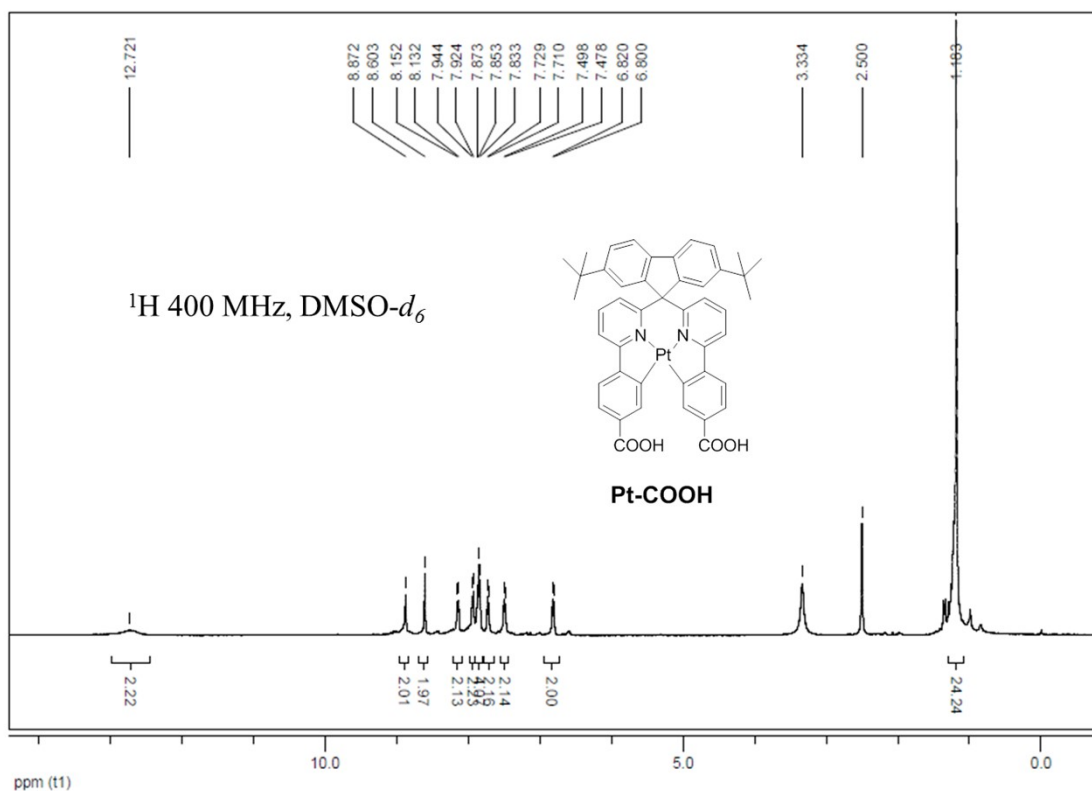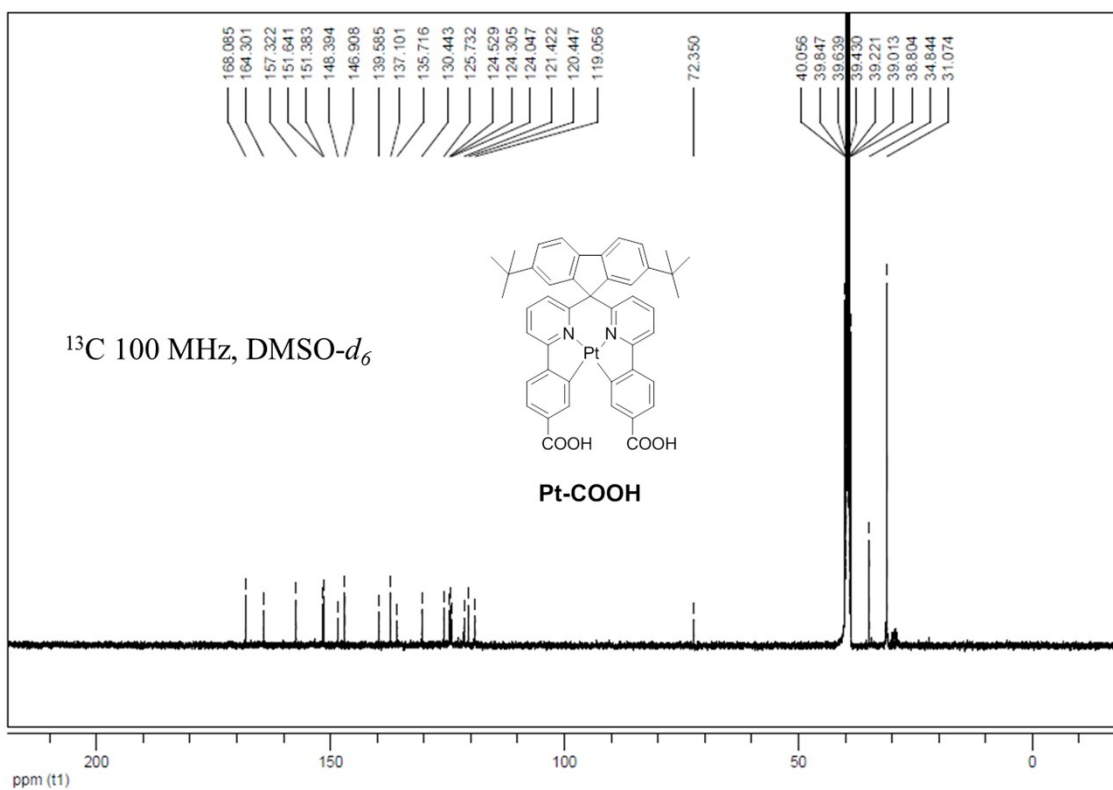

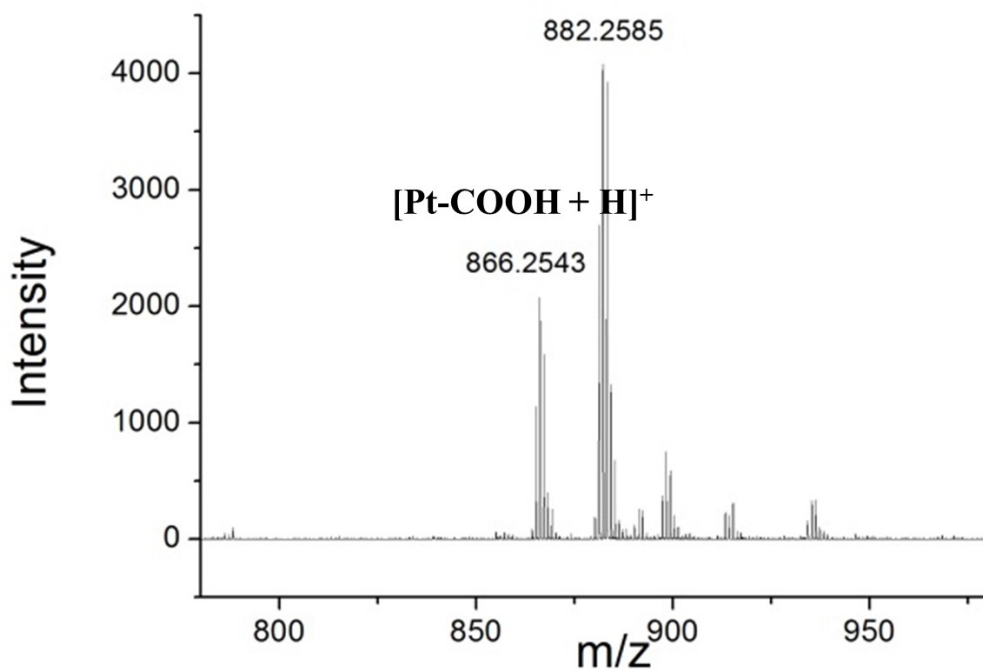

Fig. S6 Absorption spectra in DMSO and Cyclic voltammogram in 0.1 M  $n\text{-NBu}_4\text{PF}_6$  solutions in DMSO at the scan rates of 100 mV/s.

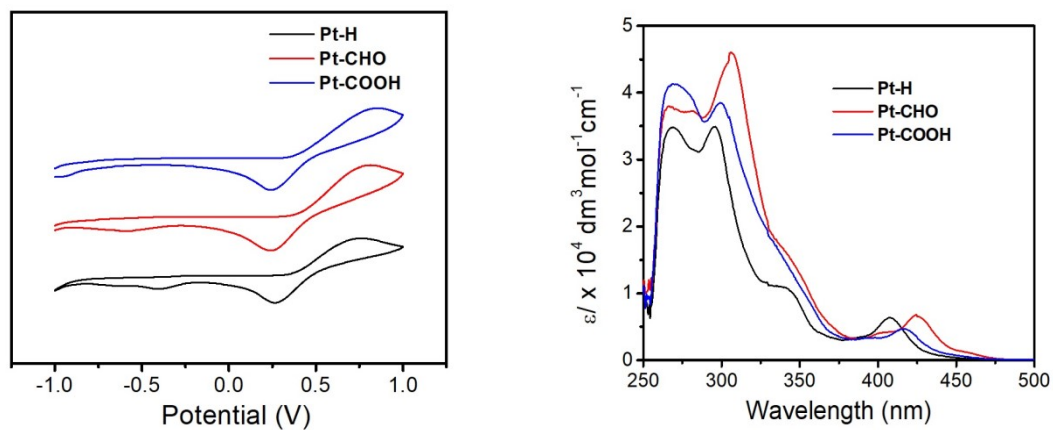

Fig. S7 Bright, luminescence, and merged photos of RAW264.7 cells treated with different concentrations of **Pt-H**.

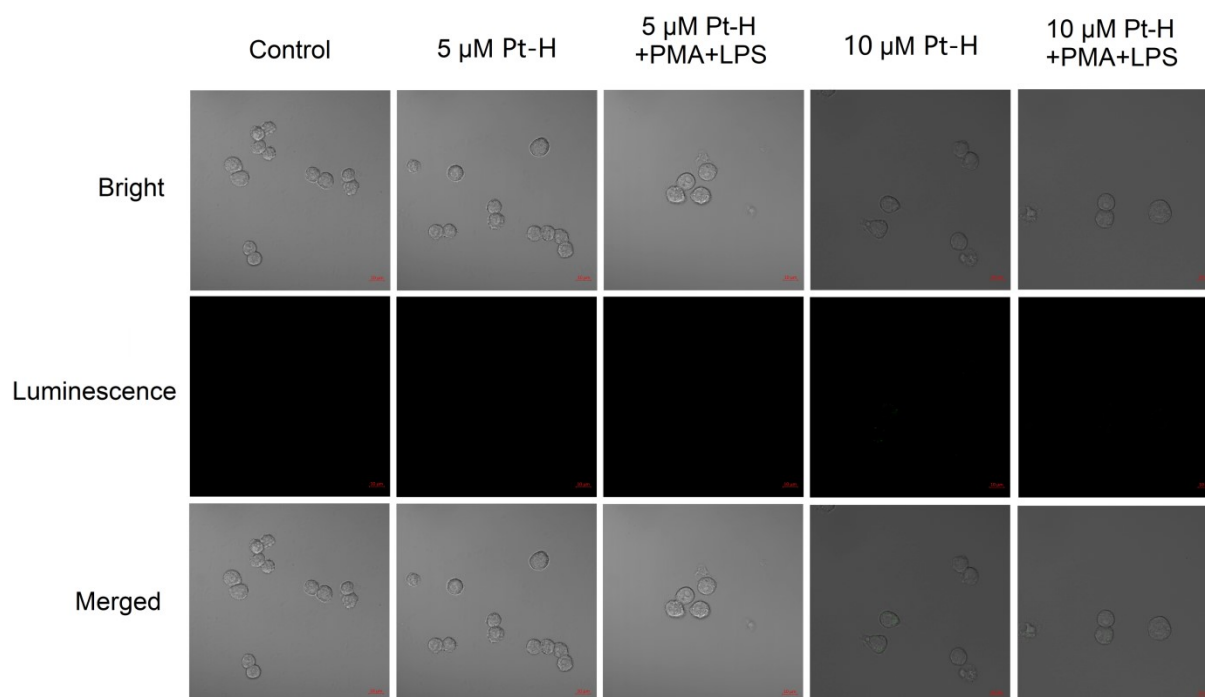

**Table S1** Electrochemical data of the probes

| complexes      | $E_{\text{ox}}^a$ (V) | $E_{\text{red}}^b$ (V) | $E_g^c$ (eV) |
|----------------|-----------------------|------------------------|--------------|
| <b>Pt-H</b>    | 0.35                  | -2.46                  | 2.81         |
| <b>Pt-CHO</b>  | 0.36                  | -2.25                  | 2.61         |
| <b>Pt-COOH</b> | 0.36                  | -2.40                  | 2.76         |

<sup>a</sup>  $E_{\text{ox}}$  was determined from onset potentials using Ag/AgCl as the reference electrode. <sup>b</sup>  $E_{\text{red}} = E_{\text{ox}} - E_g$ . <sup>c</sup> optical band gap.

**Table S2** The structure coordinates of the probes and the oxidative products.

**Pt-H**

|   |           |           |           |
|---|-----------|-----------|-----------|
| C | 1.477012  | -2.238782 | -2.993474 |
| C | 0.168082  | -2.684401 | -2.968520 |
| C | -0.686096 | -2.227784 | -1.965172 |
| N | -0.230189 | -1.357056 | -1.022766 |
| C | 1.034823  | -0.906049 | -1.036336 |
| C | 1.917424  | -1.344332 | -2.027471 |
| C | 1.500898  | 0.215743  | -0.081021 |
| C | 0.964181  | 0.303811  | 1.364681  |
| N | -0.357901 | 0.224484  | 1.587199  |
| C | -0.901495 | 0.517118  | 2.798627  |
| C | -0.075798 | 0.850122  | 3.872657  |
| C | 1.292162  | 0.897528  | 3.675508  |
| C | 1.820419  | 0.641708  | 2.414470  |
| C | -2.089178 | -2.619188 | -1.819253 |
| C | -2.365430 | 0.482769  | 2.831330  |
| C | -2.681338 | -3.579283 | -2.650123 |
| C | -3.994515 | -3.973084 | -2.440560 |
| C | -4.707526 | -3.419262 | -1.378512 |
| C | -4.120582 | -2.462663 | -0.553717 |
| C | -2.811196 | -2.006954 | -0.758190 |
| C | -3.004295 | -0.027688 | 1.667932  |
| C | -4.396674 | 0.115787  | 1.609972  |
| C | -5.125634 | 0.659820  | 2.665788  |
| C | -4.481873 | 1.090664  | 3.825043  |
| C | -3.098169 | 1.013873  | 3.899546  |
| C | 1.175147  | 1.565389  | -0.759587 |
| C | 3.028690  | 0.268581  | -0.063566 |
| C | 3.907831  | -0.699374 | 0.408269  |
| C | 5.290076  | -0.486254 | 0.349454  |
| C | 5.743299  | 0.726518  | -0.200416 |
| C | 4.871640  | 1.695871  | -0.679948 |
| C | 3.497679  | 1.465378  | -0.612919 |
| C | 2.356612  | 2.268093  | -1.043740 |
| C | 2.280674  | 3.514759  | -1.651184 |
| C | 1.028502  | 4.041897  | -1.967700 |
| C | -0.157747 | 3.350743  | -1.693267 |
| C | -0.063396 | 2.089947  | -1.078584 |
| C | 6.304427  | -1.514807 | 0.855036  |
| C | 5.629254  | -2.768723 | 1.417113  |
| C | 7.219913  | -1.941867 | -0.304258 |
| C | 7.155485  | -0.886768 | 1.971118  |
| C | -1.541845 | 3.908959  | -2.028824 |

|    |           |           |           |
|----|-----------|-----------|-----------|
| C  | -1.467750 | 5.282003  | -2.701709 |
| C  | -2.264146 | 2.941783  | -2.981976 |
| C  | -2.359725 | 4.047575  | -0.733353 |
| Pt | -1.707396 | -0.745139 | 0.327648  |
| H  | 2.158727  | -2.577865 | -3.768648 |
| H  | -0.195152 | -3.372599 | -3.722455 |
| H  | 2.933840  | -0.975969 | -2.051157 |
| H  | -0.504974 | 1.055495  | 4.846636  |
| H  | 1.956946  | 1.146457  | 4.498171  |
| H  | 2.885776  | 0.719158  | 2.248387  |
| H  | -2.118258 | -4.037295 | -3.459501 |
| H  | -4.694905 | -2.079284 | 0.282277  |
| H  | -4.928193 | -0.188479 | 0.713606  |
| H  | -2.592899 | 1.396475  | 4.783311  |
| H  | 3.509611  | -1.621063 | 0.821962  |
| H  | 6.811799  | 0.917514  | -0.258500 |
| H  | 5.261671  | 2.618158  | -1.102881 |
| H  | 3.181022  | 4.079312  | -1.881364 |
| H  | 0.986461  | 5.016932  | -2.441723 |
| H  | -0.962010 | 1.519910  | -0.847107 |
| H  | 6.393927  | -3.472120 | 1.764983  |
| H  | 4.982075  | -2.536829 | 2.270849  |
| H  | 5.028020  | -3.283881 | 0.659125  |
| H  | 7.957077  | -2.674921 | 0.045086  |
| H  | 7.768365  | -1.092949 | -0.726052 |
| H  | 6.639690  | -2.401419 | -1.112413 |
| H  | 6.528662  | -0.580490 | 2.816301  |
| H  | 7.892597  | -1.610819 | 2.338846  |
| H  | 7.701316  | -0.004061 | 1.621453  |
| H  | -2.480917 | 5.635873  | -2.922852 |
| H  | -0.991773 | 6.028731  | -2.055252 |
| H  | -0.917390 | 5.243647  | -3.649254 |
| H  | -3.258688 | 3.331639  | -3.230940 |
| H  | -2.398186 | 1.951854  | -2.533292 |
| H  | -1.702814 | 2.818329  | -3.915385 |
| H  | -1.869147 | 4.732298  | -0.031892 |
| H  | -3.356433 | 4.446523  | -0.958331 |
| H  | -2.492832 | 3.084573  | -0.228973 |
| H  | -5.051482 | 1.507400  | 4.651107  |
| H  | -4.451829 | -4.717458 | -3.086537 |
| H  | -5.728750 | -3.741294 | -1.186225 |
| H  | -6.206377 | 0.752316  | 2.582118  |

**Pt-H-2**

|   |           |           |           |
|---|-----------|-----------|-----------|
| C | 1.365828  | -0.992356 | -3.577710 |
| C | 0.091172  | -1.534842 | -3.632257 |
| C | -0.706860 | -1.490068 | -2.493916 |
| N | -0.237657 | -0.921388 | -1.353644 |
| C | 0.986763  | -0.396840 | -1.273657 |
| C | 1.820910  | -0.426586 | -2.399218 |
| C | 1.530308  | 0.349729  | -0.037356 |
| C | 0.900068  | 0.238968  | 1.365975  |
| N | -0.421112 | 0.132878  | 1.541492  |
| C | -0.993794 | 0.189980  | 2.768425  |
| C | -0.208439 | 0.378705  | 3.902052  |
| C | 1.162543  | 0.494309  | 3.747943  |
| C | 1.723971  | 0.428535  | 2.481156  |
| C | -2.062227 | -2.044330 | -2.401467 |
| C | -2.455143 | 0.059396  | 2.775930  |
| C | -2.626357 | -2.817162 | -3.422661 |
| C | -3.873253 | -3.404573 | -3.255466 |
| C | -4.548797 | -3.243318 | -2.049453 |
| C | -3.995072 | -2.469226 | -1.029248 |
| C | -2.768456 | -1.828088 | -1.195594 |
| C | -3.067485 | -0.351528 | 1.569855  |
| C | -4.459673 | -0.328747 | 1.500678  |
| C | -5.230760 | 0.020075  | 2.610466  |
| C | -4.619261 | 0.367880  | 3.811454  |
| C | -3.232703 | 0.400346  | 3.887515  |
| C | 1.538214  | 1.853744  | -0.376224 |
| C | 3.031377  | 0.071421  | 0.065419  |
| C | 3.647077  | -1.144777 | 0.326874  |
| C | 5.043522  | -1.220967 | 0.397462  |
| C | 5.776463  | -0.037805 | 0.195933  |
| C | 5.165033  | 1.182089  | -0.069521 |
| C | 3.773403  | 1.241304  | -0.137010 |
| C | 2.852977  | 2.344443  | -0.408383 |
| C | 3.064394  | 3.689049  | -0.687398 |
| C | 1.963536  | 4.511266  | -0.933627 |
| C | 0.650497  | 4.023504  | -0.912977 |
| C | 0.446375  | 2.662753  | -0.623243 |
| C | 5.782340  | -2.530454 | 0.683397  |
| C | 4.822923  | -3.708576 | 0.872112  |
| C | 6.717708  | -2.856319 | -0.492730 |
| C | 6.613570  | -2.377298 | 1.967904  |
| C | -0.568481 | 4.900746  | -1.201275 |
| C | -0.189615 | 6.358467  | -1.472089 |
| C | -1.303387 | 4.345857  | -2.433834 |

|    |           |           |           |
|----|-----------|-----------|-----------|
| C  | -1.519205 | 4.859027  | 0.007093  |
| Pt | -1.737805 | -0.738062 | 0.126580  |
| H  | 2.005918  | -1.005648 | -4.455435 |
| H  | -0.283678 | -1.973710 | -4.549271 |
| H  | 2.812144  | 0.005643  | -2.344915 |
| H  | -0.662761 | 0.406787  | 4.885606  |
| H  | 1.802466  | 0.632136  | 4.615108  |
| H  | 2.793550  | 0.529091  | 2.355685  |
| H  | -2.085479 | -2.984307 | -4.350192 |
| H  | -5.510362 | -3.727004 | -1.894985 |
| H  | -4.528422 | -2.384429 | -0.088448 |
| H  | -4.962575 | -0.571986 | 0.569782  |
| H  | -6.315232 | 0.025375  | 2.530730  |
| H  | -2.759697 | 0.723029  | 4.811402  |
| H  | 3.033484  | -2.027746 | 0.478948  |
| H  | 6.861876  | -0.070676 | 0.245844  |
| H  | 5.769268  | 2.072734  | -0.222689 |
| H  | 4.069408  | 4.103137  | -0.719158 |
| H  | 2.145152  | 5.558809  | -1.151356 |
| H  | -0.558638 | 2.234766  | -0.609923 |
| H  | 5.397166  | -4.619855 | 1.073385  |
| H  | 4.144133  | -3.552553 | 1.718251  |
| H  | 4.218056  | -3.890739 | -0.023492 |
| H  | 7.258501  | -3.790645 | -0.299093 |
| H  | 7.461201  | -2.068507 | -0.654542 |
| H  | 6.149707  | -2.978082 | -1.421920 |
| H  | 5.969791  | -2.152869 | 2.825863  |
| H  | 7.154569  | -3.306950 | 2.182326  |
| H  | 7.352766  | -1.573488 | 1.883331  |
| H  | -1.096116 | 6.942481  | -1.667358 |
| H  | 0.319202  | 6.814852  | -0.614525 |
| H  | 0.459734  | 6.455454  | -2.350290 |
| H  | -2.185188 | 4.960889  | -2.653743 |
| H  | -1.639577 | 3.316357  | -2.270349 |
| H  | -0.652374 | 4.358258  | -3.315896 |
| H  | -1.023773 | 5.231676  | 0.911268  |
| H  | -2.397917 | 5.487661  | -0.183803 |
| H  | -1.870389 | 3.840649  | 0.203385  |
| H  | -5.218068 | 0.638249  | 4.676562  |
| H  | -4.303299 | -4.004022 | -4.052828 |
| O  | -1.089638 | -2.421111 | 1.043607  |
| H  | -1.762134 | -3.097193 | 0.881732  |
| O  | -2.202102 | 1.011090  | -0.805965 |
| H  | -3.120319 | 1.204530  | -0.572242 |

**Pt-CHO**

|   |           |           |           |
|---|-----------|-----------|-----------|
| C | 1.963631  | 2.860077  | 2.399876  |
| C | 0.628464  | 3.223326  | 2.370868  |
| C | -0.247951 | 2.515136  | 1.552106  |
| N | 0.205453  | 1.484395  | 0.787479  |
| C | 1.495305  | 1.111442  | 0.808204  |
| C | 2.402372  | 1.799980  | 1.620398  |
| C | 1.980145  | -0.164282 | 0.085280  |
| C | 1.368833  | -0.595759 | -1.265167 |
| N | 0.034760  | -0.626716 | -1.413748 |
| C | -0.552882 | -1.206453 | -2.493855 |
| C | 0.230098  | -1.734397 | -3.519172 |
| C | 1.607730  | -1.675969 | -3.405562 |
| C | 2.185381  | -1.121887 | -2.269082 |
| C | -1.683350 | 2.789985  | 1.429810  |
| C | -2.017396 | -1.245810 | -2.439962 |
| C | -2.285887 | 3.870048  | 2.088973  |
| C | -3.634122 | 4.129395  | 1.909095  |
| C | -4.376218 | 3.317323  | 1.047866  |
| C | -3.769479 | 2.242867  | 0.389857  |
| C | -2.423255 | 1.921525  | 0.576691  |
| C | -2.620977 | -0.522037 | -1.376307 |
| C | -3.998365 | -0.707785 | -1.212045 |
| C | -4.750150 | -1.499379 | -2.083813 |
| C | -4.137613 | -2.148077 | -3.161796 |
| C | -2.770887 | -2.028661 | -3.328899 |
| C | 1.784883  | -1.348432 | 1.059633  |
| C | 3.504694  | -0.137631 | -0.028551 |
| C | 4.287568  | 0.748521  | -0.759644 |
| C | 5.682139  | 0.626760  | -0.754790 |
| C | 6.246425  | -0.410357 | 0.009988  |
| C | 5.471303  | -1.295858 | 0.747774  |
| C | 4.083400  | -1.158676 | 0.730765  |
| C | 3.025614  | -1.907559 | 1.403402  |
| C | 3.068275  | -2.994448 | 2.266954  |
| C | 1.874398  | -3.506425 | 2.775405  |
| C | 0.630196  | -2.956583 | 2.443870  |
| C | 0.604467  | -1.856194 | 1.569112  |
| C | 6.594729  | 1.570946  | -1.540921 |
| C | 5.806386  | 2.633656  | -2.311106 |
| C | 7.544940  | 2.289108  | -0.568407 |
| C | 7.419930  | 0.758121  | -2.552278 |
| C | -0.691225 | -3.501018 | 2.989135  |



|    |           |           |           |
|----|-----------|-----------|-----------|
| C  | -0.487006 | -4.699136 | 3.919809  |
| C  | -1.410415 | -2.393121 | 3.777285  |
| C  | -1.580098 | -3.945721 | 1.815102  |
| Pt | -1.299787 | 0.523252  | -0.300996 |
| H  | 2.665499  | 3.393808  | 3.034435  |
| H  | 0.266362  | 4.040664  | 2.982883  |
| H  | 3.439899  | 1.496528  | 1.650853  |
| H  | -0.237467 | -2.171858 | -4.393562 |
| H  | 2.240893  | -2.072993 | -4.194082 |
| H  | 3.260746  | -1.111719 | -2.159170 |
| H  | -1.706201 | 4.521195  | 2.737384  |
| H  | -4.391325 | 1.676053  | -0.293095 |
| H  | -4.513211 | -0.242043 | -0.375622 |
| H  | -2.286788 | -2.568748 | -4.138640 |
| H  | 3.805641  | 1.534347  | -1.333771 |
| H  | 7.326796  | -0.527465 | 0.031435  |
| H  | 5.946300  | -2.081235 | 1.330028  |
| H  | 4.016055  | -3.446728 | 2.548571  |
| H  | 1.925134  | -4.356156 | 3.447997  |
| H  | -0.342663 | -1.399834 | 1.285286  |
| H  | 6.501365  | 3.282118  | -2.855928 |
| H  | 5.127909  | 2.186754  | -3.046975 |
| H  | 5.217443  | 3.271205  | -1.641631 |
| H  | 8.210562  | 2.964797  | -1.118847 |
| H  | 8.171946  | 1.583316  | -0.013426 |
| H  | 6.983290  | 2.884269  | 0.160513  |
| H  | 6.767534  | 0.241821  | -3.265612 |
| H  | 8.085332  | 1.421130  | -3.118171 |
| H  | 8.042099  | 0.003318  | -2.059835 |
| H  | -1.459677 | -5.051425 | 4.280593  |
| H  | -0.002902 | -5.537823 | 3.405806  |
| H  | 0.115119  | -4.437111 | 4.797821  |
| H  | -2.361148 | -2.769709 | 4.173611  |
| H  | -1.633551 | -1.525144 | 3.147709  |
| H  | -0.800044 | -2.052444 | 4.621644  |
| H  | -1.093468 | -4.736413 | 1.232539  |
| H  | -2.532804 | -4.337423 | 2.191515  |
| H  | -1.806834 | -3.116340 | 1.136631  |
| H  | -4.747327 | -2.750653 | -3.828144 |
| H  | -4.110647 | 4.963624  | 2.419745  |
| C  | -5.808183 | 3.603003  | 0.833757  |
| O  | -6.546941 | 2.955211  | 0.123614  |
| H  | -6.191563 | 4.488289  | 1.390441  |
| C  | -6.201825 | -1.653799 | -1.860853 |

|   |           |           |           |
|---|-----------|-----------|-----------|
| O | -6.935689 | -2.324671 | -2.555782 |
| H | -6.599496 | -1.096322 | -0.984824 |

**Pt-CHO-2**

|   |           |           |           |
|---|-----------|-----------|-----------|
| C | 1.856759  | -1.460802 | -3.403613 |
| C | 0.531572  | -1.865015 | -3.475638 |
| C | -0.307802 | -1.603055 | -2.399718 |
| N | 0.166117  | -0.964304 | -1.299239 |
| C | 1.436501  | -0.569656 | -1.202647 |
| C | 2.314170  | -0.816812 | -2.268380 |
| C | 2.006357  | 0.246661  | -0.025385 |
| C | 1.301092  | 0.377826  | 1.338669  |
| N | -0.029570 | 0.419916  | 1.451874  |
| C | -0.644490 | 0.685410  | 2.630200  |
| C | 0.104213  | 0.937900  | 3.774784  |
| C | 1.486162  | 0.902886  | 3.684652  |
| C | 2.090668  | 0.626865  | 2.468306  |
| C | -1.723901 | -1.986176 | -2.334847 |
| C | -2.111249 | 0.697731  | 2.574004  |
| C | -2.323748 | -2.787225 | -3.313762 |
| C | -3.640738 | -3.196242 | -3.172262 |
| C | -4.355819 | -2.827488 | -2.032854 |
| C | -3.756641 | -2.025763 | -1.053037 |
| C | -2.457148 | -1.559982 | -1.198739 |
| C | -2.709937 | 0.213265  | 1.388208  |
| C | -4.088635 | 0.355366  | 1.255108  |
| C | -4.866846 | 0.894788  | 2.285013  |
| C | -4.267308 | 1.319780  | 3.473184  |
| C | -2.893518 | 1.231623  | 3.608561  |
| C | 2.216701  | 1.688247  | -0.530376 |
| C | 3.454672  | -0.193145 | 0.200817  |
| C | 3.900162  | -1.432967 | 0.637774  |
| C | 5.271470  | -1.664722 | 0.801762  |
| C | 6.154623  | -0.609778 | 0.510239  |
| C | 5.713663  | 0.632739  | 0.069536  |
| C | 4.345014  | 0.847919  | -0.089060 |
| C | 3.582682  | 2.011596  | -0.539465 |
| C | 3.971856  | 3.278565  | -0.956495 |
| C | 2.993893  | 4.189774  | -1.358785 |
| C | 1.630387  | 3.867978  | -1.360200 |
| C | 1.245842  | 2.585283  | -0.931136 |
| C | 5.827239  | -3.007617 | 1.281290  |
| C | 4.720773  | -4.032100 | 1.546118  |
| C | 6.768078  | -3.582392 | 0.209408  |

|    |           |           |           |
|----|-----------|-----------|-----------|
| C  | 6.610936  | -2.797809 | 2.587540  |
| C  | 0.544823  | 4.844092  | -1.815397 |
| C  | 1.115417  | 6.202713  | -2.228270 |
| C  | -0.200873 | 4.237948  | -3.016945 |
| C  | -0.453586 | 5.062297  | -0.665916 |
| Pt | -1.367441 | -0.460441 | 0.065869  |
| H  | 2.532521  | -1.643306 | -4.234216 |
| H  | 0.154473  | -2.362767 | -4.360945 |
| H  | 3.344024  | -0.489479 | -2.200836 |
| H  | -0.386454 | 1.133232  | 4.720939  |
| H  | 2.098296  | 1.087228  | 4.562934  |
| H  | 3.169343  | 0.608585  | 2.389765  |
| H  | -1.760655 | -3.112124 | -4.183685 |
| H  | -4.348209 | -1.801620 | -0.172305 |
| H  | -4.589078 | 0.059318  | 0.336702  |
| H  | -2.424958 | 1.606353  | 4.514378  |
| H  | 3.175152  | -2.212281 | 0.853208  |
| H  | 7.223850  | -0.764562 | 0.629868  |
| H  | 6.431001  | 1.420154  | -0.147423 |
| H  | 5.020843  | 3.564257  | -0.975564 |
| H  | 3.314105  | 5.174728  | -1.682691 |
| H  | 0.196009  | 2.284155  | -0.927915 |
| H  | 5.167065  | -4.973252 | 1.886029  |
| H  | 4.028259  | -3.695158 | 2.325856  |
| H  | 4.140258  | -4.250068 | 0.642392  |
| H  | 7.178776  | -4.543226 | 0.542304  |
| H  | 7.610676  | -2.913758 | 0.003152  |
| H  | 6.233056  | -3.749104 | -0.732311 |
| H  | 5.961334  | -2.396510 | 3.373585  |
| H  | 7.021758  | -3.751626 | 2.939871  |
| H  | 7.447512  | -2.103237 | 2.455814  |
| H  | 0.298800  | 6.863418  | -2.540210 |
| H  | 1.640139  | 6.694579  | -1.400503 |
| H  | 1.808649  | 6.115187  | -3.073256 |
| H  | -0.988292 | 4.923292  | -3.354741 |
| H  | -0.670716 | 3.283068  | -2.757874 |
| H  | 0.483257  | 4.066975  | -3.856396 |
| H  | 0.045903  | 5.480031  | 0.215975  |
| H  | -1.238024 | 5.763208  | -0.976987 |
| H  | -0.937655 | 4.124570  | -0.373674 |
| H  | -4.893792 | 1.733120  | 4.257727  |
| H  | -4.109573 | -3.816886 | -3.932812 |
| O  | -0.953295 | -2.099951 | 1.174586  |
| H  | -1.748474 | -2.650636 | 1.168474  |

|   |           |           |           |
|---|-----------|-----------|-----------|
| O | -1.578663 | 1.217665  | -1.066054 |
| H | -2.478826 | 1.538064  | -0.917206 |
| C | -5.747849 | -3.284481 | -1.856585 |
| O | -6.450567 | -3.003805 | -0.909491 |
| H | -6.133780 | -3.926985 | -2.679264 |
| C | -6.328342 | 1.019750  | 2.108046  |
| O | -7.080303 | 1.482861  | 2.938517  |
| H | -6.713158 | 0.649353  | 1.132860  |

**Pt-COOH**

|   |           |           |           |
|---|-----------|-----------|-----------|
| C | 2.073884  | 3.109015  | 2.108866  |
| C | 0.724135  | 3.407511  | 2.045353  |
| C | -0.116909 | 2.584570  | 1.299458  |
| N | 0.385567  | 1.505860  | 0.639034  |
| C | 1.690648  | 1.194981  | 0.695332  |
| C | 2.563114  | 1.998854  | 1.435904  |
| C | 2.233037  | -0.122633 | 0.099015  |
| C | 1.648036  | -0.704676 | -1.206100 |
| N | 0.317173  | -0.808508 | -1.351296 |
| C | -0.239645 | -1.509961 | -2.373999 |
| C | 0.570227  | -2.093822 | -3.346794 |
| C | 1.943390  | -1.964357 | -3.238700 |
| C | 2.491234  | -1.283704 | -2.157377 |
| C | -1.561871 | 2.781922  | 1.150202  |
| C | -1.700891 | -1.610613 | -2.315363 |
| C | -2.215028 | 3.895019  | 1.696611  |
| C | -3.570641 | 4.083966  | 1.491992  |
| C | -4.272877 | 3.158346  | 0.713823  |
| C | -3.620384 | 2.048426  | 0.171387  |
| C | -2.260371 | 1.804244  | 0.389848  |
| C | -2.340304 | -0.824967 | -1.318688 |
| C | -3.705909 | -1.057150 | -1.123524 |
| C | -4.419636 | -1.956948 | -1.920714 |
| C | -3.779229 | -2.663925 | -2.942440 |
| C | -2.417958 | -2.499509 | -3.127466 |
| C | 2.082007  | -1.215691 | 1.181436  |
| C | 3.755692  | -0.042690 | -0.013920 |
| C | 4.504980  | 0.802509  | -0.824348 |
| C | 5.903375  | 0.741870  | -0.804744 |
| C | 6.506407  | -0.192374 | 0.056824  |
| C | 5.764837  | -1.036072 | 0.873921  |
| C | 4.372457  | -0.960954 | 0.840688  |
| C | 3.343023  | -1.686391 | 1.579703  |
| C | 3.426261  | -2.682364 | 2.544060  |

|    |           |           |           |
|----|-----------|-----------|-----------|
| C  | 2.251993  | -3.192853 | 3.097667  |
| C  | 0.987855  | -2.730240 | 2.712622  |
| C  | 0.921056  | -1.721377 | 1.735760  |
| C  | 6.779498  | 1.645999  | -1.674855 |
| C  | 5.950822  | 2.591971  | -2.548090 |
| C  | 7.687930  | 2.497639  | -0.772626 |
| C  | 7.649464  | 0.778290  | -2.599323 |
| C  | -0.312813 | -3.275924 | 3.304512  |
| C  | -0.063037 | -4.359305 | 4.356833  |
| C  | -1.091813 | -2.127685 | 3.968067  |
| C  | -1.167057 | -3.882507 | 2.178054  |
| Pt | -1.072666 | 0.377556  | -0.349571 |
| H  | 2.748702  | 3.732853  | 2.688271  |
| H  | 0.322975  | 4.263234  | 2.575033  |
| H  | 3.613067  | 1.746889  | 1.495476  |
| H  | 0.125649  | -2.629938 | -4.177227 |
| H  | 2.596903  | -2.403392 | -3.987386 |
| H  | 3.564637  | -1.216277 | -2.048470 |
| H  | -1.667810 | 4.631921  | 2.278152  |
| H  | -4.213494 | 1.385879  | -0.447494 |
| H  | -4.237814 | -0.544328 | -0.331080 |
| H  | -1.913932 | -3.087238 | -3.890381 |
| H  | 3.993580  | 1.508878  | -1.471544 |
| H  | 7.590666  | -0.260157 | 0.092090  |
| H  | 6.269086  | -1.741167 | 1.529718  |
| H  | 4.390568  | -3.064848 | 2.869685  |
| H  | 2.334373  | -3.970736 | 3.849456  |
| H  | -0.042588 | -1.334198 | 1.408013  |
| H  | 6.620521  | 3.215019  | -3.151144 |
| H  | 5.298980  | 2.045052  | -3.239122 |
| H  | 5.328450  | 3.264456  | -1.946502 |
| H  | 8.327264  | 3.146564  | -1.383234 |
| H  | 8.341054  | 1.878173  | -0.148861 |
| H  | 7.093558  | 3.134258  | -0.107487 |
| H  | 7.027449  | 0.165130  | -3.261271 |
| H  | 8.287984  | 1.413765  | -3.224705 |
| H  | 8.302039  | 0.104913  | -2.033641 |
| H  | -1.021964 | -4.715170 | 4.749540  |
| H  | 0.461879  | -5.224818 | 3.935701  |
| H  | 0.520039  | -3.979522 | 5.204152  |
| H  | -2.027497 | -2.506497 | 4.396774  |
| H  | -1.350188 | -1.342152 | 3.250072  |
| H  | -0.506954 | -1.671472 | 4.775161  |
| H  | -0.637149 | -4.704918 | 1.683779  |

|   |           |           |           |
|---|-----------|-----------|-----------|
| H | -2.104136 | -4.278511 | 2.587837  |
| H | -1.425800 | -3.139791 | 1.415819  |
| H | -4.359601 | -3.346874 | -3.554151 |
| H | -4.081712 | 4.942733  | 1.913023  |
| C | -5.718099 | 3.321133  | 0.428905  |
| O | -6.389727 | 2.565055  | -0.238256 |
| O | -6.248186 | 4.426557  | 0.997301  |
| H | -7.185237 | 4.418837  | 0.738373  |
| C | -5.870587 | -2.195084 | -1.728426 |
| O | -6.549437 | -2.923400 | -2.421645 |
| O | -6.385452 | -1.513024 | -0.689187 |
| H | -7.334234 | -1.723806 | -0.681839 |

**Pt-COOH-2**

|   |           |           |           |
|---|-----------|-----------|-----------|
| C | 1.955927  | -1.866559 | -3.227255 |
| C | 0.612559  | -2.212526 | -3.233103 |
| C | -0.191449 | -1.793588 | -2.179768 |
| N | 0.334547  | -1.060937 | -1.165078 |
| C | 1.623568  | -0.719884 | -1.132608 |
| C | 2.466597  | -1.124187 | -2.177680 |
| C | 2.254176  | 0.190971  | -0.059874 |
| C | 1.582138  | 0.501260  | 1.292129  |
| N | 0.257584  | 0.628872  | 1.414801  |
| C | -0.322200 | 1.048987  | 2.565466  |
| C | 0.458092  | 1.378423  | 3.668741  |
| C | 1.834264  | 1.257416  | 3.567608  |
| C | 2.402751  | 0.822394  | 2.380429  |
| C | -1.621810 | -2.098353 | -2.049961 |
| C | -1.786811 | 1.135911  | 2.523942  |
| C | -2.277691 | -2.980137 | -2.917178 |
| C | -3.607007 | -3.313632 | -2.712794 |
| C | -4.282040 | -2.780301 | -1.613460 |
| C | -3.631820 | -1.893829 | -0.747696 |
| C | -2.313388 | -1.509569 | -0.964953 |
| C | -2.430491 | 0.562037  | 1.403546  |
| C | -3.799127 | 0.766223  | 1.257554  |
| C | -4.531420 | 1.457086  | 2.230437  |
| C | -3.894580 | 1.967280  | 3.362363  |
| C | -2.524511 | 1.818270  | 3.498842  |
| C | 2.521313  | 1.558653  | -0.719433 |
| C | 3.684617  | -0.291232 | 0.191496  |
| C | 4.080596  | -1.498286 | 0.750608  |
| C | 5.442513  | -1.777399 | 0.918748  |
| C | 6.367941  | -0.802495 | 0.505273  |

|    |           |           |           |
|----|-----------|-----------|-----------|
| C  | 5.976536  | 0.406754  | -0.057921 |
| C  | 4.616538  | 0.669556  | -0.219375 |
| C  | 3.900287  | 1.814136  | -0.780680 |
| C  | 4.339738  | 3.010065  | -1.334919 |
| C  | 3.397600  | 3.918950  | -1.819525 |
| C  | 2.021022  | 3.663560  | -1.769531 |
| C  | 1.585680  | 2.453418  | -1.200940 |
| C  | 5.943858  | -3.088224 | 1.529132  |
| C  | 4.795685  | -4.024885 | 1.914568  |
| C  | 6.836964  | -3.816653 | 0.511218  |
| C  | 6.760011  | -2.781970 | 2.795810  |
| C  | 0.973517  | 4.635120  | -2.314636 |
| C  | 1.597857  | 5.915915  | -2.872944 |
| C  | 0.185781  | 3.940731  | -3.439136 |
| C  | 0.000778  | 5.017237  | -1.186054 |
| Pt | -1.149060 | -0.327867 | 0.151852  |
| H  | 2.604990  | -2.171359 | -4.043212 |
| H  | 0.193852  | -2.785800 | -4.051538 |
| H  | 3.511684  | -0.841413 | -2.163062 |
| H  | -0.006102 | 1.698503  | 4.594135  |
| H  | 2.470228  | 1.498183  | 4.414805  |
| H  | 3.477404  | 0.736002  | 2.292770  |
| H  | -1.747668 | -3.431139 | -3.751031 |
| H  | -4.195160 | -1.533240 | 0.105439  |
| H  | -4.324911 | 0.402042  | 0.382694  |
| H  | -2.027654 | 2.261967  | 4.357069  |
| H  | 3.324256  | -2.214805 | 1.057006  |
| H  | 7.430989  | -0.995050 | 0.625461  |
| H  | 6.725305  | 1.131672  | -0.367058 |
| H  | 5.400253  | 3.242015  | -1.397562 |
| H  | 3.756804  | 4.847856  | -2.250451 |
| H  | 0.523256  | 2.205087  | -1.152179 |
| H  | 5.203637  | -4.946416 | 2.344573  |
| H  | 4.134413  | -3.575792 | 2.664311  |
| H  | 4.188697  | -4.306644 | 1.046591  |
| H  | 7.207988  | -4.756494 | 0.937603  |
| H  | 7.706169  | -3.214931 | 0.224838  |
| H  | 6.277542  | -4.054198 | -0.400632 |
| H  | 6.144466  | -2.269164 | 3.543491  |
| H  | 7.131139  | -3.712847 | 3.241315  |
| H  | 7.626198  | -2.147005 | 2.580940  |
| H  | 0.806896  | 6.577172  | -3.244249 |
| H  | 2.155957  | 6.466607  | -2.106265 |
| H  | 2.274191  | 5.709493  | -3.710940 |

|   |           |           |           |
|---|-----------|-----------|-----------|
| H | -0.575190 | 4.621733  | -3.840506 |
| H | -0.321970 | 3.040695  | -3.076239 |
| H | 0.850437  | 3.651634  | -4.261712 |
| H | 0.529991  | 5.500612  | -0.356550 |
| H | -0.754875 | 5.717859  | -1.562341 |
| H | -0.521804 | 4.138401  | -0.794124 |
| H | -4.485235 | 2.494197  | 4.104624  |
| H | -4.115056 | -3.997545 | -3.383703 |
| O | -0.799973 | -1.847846 | 1.439675  |
| H | -1.616420 | -2.364184 | 1.488887  |
| O | -1.298130 | 1.219872  | -1.161131 |
| H | -2.193608 | 1.572658  | -1.066817 |
| C | -5.690008 | -3.130619 | -1.311723 |
| O | -6.323915 | -2.711653 | -0.368112 |
| O | -6.224737 | -3.986118 | -2.207751 |
| H | -7.135953 | -4.138074 | -1.904496 |
| C | -5.993070 | 1.672844  | 2.103592  |
| O | -6.683637 | 2.222960  | 2.934296  |
| O | -6.498162 | 1.190584  | 0.953495  |
| H | -7.453837 | 1.364229  | 0.991682  |



**Table S3** The excited states analysis of the probes and the oxidative products.**Pt-H**

|                   |          |                                  |          |          |           |
|-------------------|----------|----------------------------------|----------|----------|-----------|
| Excited State 1:  | f=0.0039 | $\langle S^{*2} \rangle = 0.000$ | 415.87nm | 2.9813eV | Singlet-A |
| Excited State 2:  | f=0.0457 | $\langle S^{*2} \rangle = 0.000$ | 385.14nm | 3.2192eV | Singlet-A |
| Excited State 3:  | f=0.0062 | $\langle S^{*2} \rangle = 0.000$ | 372.69nm | 3.3267eV | Singlet-A |
| Excited State 4:  | f=0.0846 | $\langle S^{*2} \rangle = 0.000$ | 357.49nm | 3.4682eV | Singlet-A |
| Excited State 5:  | f=0.0040 | $\langle S^{*2} \rangle = 0.000$ | 342.43nm | 3.6207eV | Singlet-A |
| Excited State 6:  | f=0.0222 | $\langle S^{*2} \rangle = 0.000$ | 337.10nm | 3.6780eV | Singlet-A |
| Excited State 7:  | f=0.0212 | $\langle S^{*2} \rangle = 0.000$ | 334.93nm | 3.7018eV | Singlet-A |
| Excited State 8:  | f=0.0089 | $\langle S^{*2} \rangle = 0.000$ | 322.94nm | 3.8392eV | Singlet-A |
| Excited State 9:  | f=0.0074 | $\langle S^{*2} \rangle = 0.000$ | 320.43nm | 3.8693eV | Singlet-A |
| Excited State 10: | f=0.0141 | $\langle S^{*2} \rangle = 0.000$ | 317.21nm | 3.9085eV | Singlet-A |

|                   |          |                                  |          |          |           |
|-------------------|----------|----------------------------------|----------|----------|-----------|
| Excited State 1:  | f=0.0000 | $\langle S^{*2} \rangle = 2.000$ | 495.24nm | 2.5035eV | Triplet-A |
| Excited State 2:  | f=0.0000 | $\langle S^{*2} \rangle = 2.000$ | 460.93nm | 2.6899eV | Triplet-A |
| Excited State 3:  | f=0.0000 | $\langle S^{*2} \rangle = 2.000$ | 433.79nm | 2.8581eV | Triplet-A |
| Excited State 4:  | f=0.0000 | $\langle S^{*2} \rangle = 2.000$ | 416.50nm | 2.9768eV | Triplet-A |
| Excited State 5:  | f=0.0000 | $\langle S^{*2} \rangle = 2.000$ | 396.82nm | 3.1244eV | Triplet-A |
| Excited State 6:  | f=0.0000 | $\langle S^{*2} \rangle = 2.000$ | 382.41nm | 3.2422eV | Triplet-A |
| Excited State 7:  | f=0.0000 | $\langle S^{*2} \rangle = 2.000$ | 374.65nm | 3.3093eV | Triplet-A |
| Excited State 8:  | f=0.0000 | $\langle S^{*2} \rangle = 2.000$ | 373.15nm | 3.3227eV | Triplet-A |
| Excited State 9:  | f=0.0000 | $\langle S^{*2} \rangle = 2.000$ | 363.36nm | 3.4122eV | Triplet-A |
| Excited State 10: | f=0.0000 | $\langle S^{*2} \rangle = 2.000$ | 359.57nm | 3.4481eV | Triplet-A |

**Pt-H-2**

|                   |          |                                  |          |          |           |
|-------------------|----------|----------------------------------|----------|----------|-----------|
| Excited State 1:  | f=0.0121 | $\langle S^{*2} \rangle = 0.000$ | 368.27nm | 3.3667eV | Singlet-A |
| Excited State 2:  | f=0.0069 | $\langle S^{*2} \rangle = 0.000$ | 347.06nm | 3.5724eV | Singlet-A |
| Excited State 3:  | f=0.0301 | $\langle S^{*2} \rangle = 0.000$ | 334.71nm | 3.7043eV | Singlet-A |
| Excited State 4:  | f=0.0073 | $\langle S^{*2} \rangle = 0.000$ | 322.68nm | 3.8423eV | Singlet-A |
| Excited State 5:  | f=0.0046 | $\langle S^{*2} \rangle = 0.000$ | 317.21nm | 3.9086eV | Singlet-A |
| Excited State 6:  | f=0.0018 | $\langle S^{*2} \rangle = 0.000$ | 315.91nm | 3.9247eV | Singlet-A |
| Excited State 7:  | f=0.0704 | $\langle S^{*2} \rangle = 0.000$ | 309.38nm | 4.0075eV | Singlet-A |
| Excited State 8:  | f=0.0042 | $\langle S^{*2} \rangle = 0.000$ | 306.14nm | 4.0500eV | Singlet-A |
| Excited State 9:  | f=0.0063 | $\langle S^{*2} \rangle = 0.000$ | 304.89nm | 4.0665eV | Singlet-A |
| Excited State 10: | f=0.0112 | $\langle S^{*2} \rangle = 0.000$ | 298.37nm | 4.1554eV | Singlet-A |

|                  |          |                                  |          |          |           |
|------------------|----------|----------------------------------|----------|----------|-----------|
| Excited State 1: | f=0.0000 | $\langle S^{*2} \rangle = 2.000$ | 443.12nm | 2.7980eV | Triplet-A |
| Excited State 2: | f=0.0000 | $\langle S^{*2} \rangle = 2.000$ | 435.46nm | 2.8472eV | Triplet-A |
| Excited State 3: | f=0.0000 | $\langle S^{*2} \rangle = 2.000$ | 432.81nm | 2.8646eV | Triplet-A |
| Excited State 4: | f=0.0000 | $\langle S^{*2} \rangle = 2.000$ | 376.30nm | 3.2948eV | Triplet-A |
| Excited State 5: | f=0.0000 | $\langle S^{*2} \rangle = 2.000$ | 365.40nm | 3.3931eV | Triplet-A |
| Excited State 6: | f=0.0000 | $\langle S^{*2} \rangle = 2.000$ | 353.82nm | 3.5042eV | Triplet-A |
| Excited State 7: | f=0.0000 | $\langle S^{*2} \rangle = 2.000$ | 344.36nm | 3.6004eV | Triplet-A |
| Excited State 8: | f=0.0000 | $\langle S^{*2} \rangle = 2.000$ | 343.66nm | 3.6078eV | Triplet-A |

|                   |          |              |          |          |           |
|-------------------|----------|--------------|----------|----------|-----------|
| Excited State 9:  | f=0.0000 | <S**2>=2.000 | 332.77nm | 3.7259eV | Triplet-A |
| Excited State 10: | f=0.0000 | <S**2>=2.000 | 331.50nm | 3.7401eV | Triplet-A |

### Pt-CHO

|                   |          |              |          |          |           |
|-------------------|----------|--------------|----------|----------|-----------|
| Excited State 1:  | f=0.0090 | <S**2>=0.000 | 431.70nm | 2.8720eV | Singlet-A |
| Excited State 2:  | f=0.0518 | <S**2>=0.000 | 400.69nm | 3.0943eV | Singlet-A |
| Excited State 3:  | f=0.0161 | <S**2>=0.000 | 394.65nm | 3.1416eV | Singlet-A |
| Excited State 4:  | f=0.0386 | <S**2>=0.000 | 379.27nm | 3.2690eV | Singlet-A |
| Excited State 5:  | f=0.0032 | <S**2>=0.000 | 367.39nm | 3.3747eV | Singlet-A |
| Excited State 6:  | f=0.0021 | <S**2>=0.000 | 355.81nm | 3.4846eV | Singlet-A |
| Excited State 7:  | f=0.0175 | <S**2>=0.000 | 353.75nm | 3.5049eV | Singlet-A |
| Excited State 8:  | f=0.0058 | <S**2>=0.000 | 351.36nm | 3.5287eV | Singlet-A |
| Excited State 9:  | f=0.0132 | <S**2>=0.000 | 344.27nm | 3.6013eV | Singlet-A |
| Excited State 10: | f=0.0598 | <S**2>=0.000 | 332.94nm | 3.7239eV | Singlet-A |

|                   |          |              |          |          |           |
|-------------------|----------|--------------|----------|----------|-----------|
| Excited State 1:  | f=0.0000 | <S**2>=2.000 | 530.37nm | 2.3377eV | Triplet-A |
| Excited State 2:  | f=0.0000 | <S**2>=2.000 | 504.86nm | 2.4558eV | Triplet-A |
| Excited State 3:  | f=0.0000 | <S**2>=2.000 | 434.41nm | 2.8541eV | Triplet-A |
| Excited State 4:  | f=0.0000 | <S**2>=2.000 | 434.17nm | 2.8557eV | Triplet-A |
| Excited State 5:  | f=0.0000 | <S**2>=2.000 | 423.58nm | 2.9271eV | Triplet-A |
| Excited State 6:  | f=0.0000 | <S**2>=2.000 | 419.22nm | 2.9575eV | Triplet-A |
| Excited State 7:  | f=0.0000 | <S**2>=2.000 | 415.02nm | 2.9875eV | Triplet-A |
| Excited State 8:  | f=0.0000 | <S**2>=2.000 | 407.66nm | 3.0413eV | Triplet-A |
| Excited State 9:  | f=0.0000 | <S**2>=2.000 | 398.28nm | 3.1130eV | Triplet-A |
| Excited State 10: | f=0.0000 | <S**2>=2.000 | 392.84nm | 3.1561eV | Triplet-A |

### Pt-CHO-2

|                   |          |              |          |          |           |
|-------------------|----------|--------------|----------|----------|-----------|
| Excited State 1:  | f=0.0089 | <S**2>=0.000 | 412.58nm | 3.0051eV | Singlet-A |
| Excited State 2:  | f=0.0046 | <S**2>=0.000 | 386.58nm | 3.2072eV | Singlet-A |
| Excited State 3:  | f=0.0148 | <S**2>=0.000 | 359.60nm | 3.4478eV | Singlet-A |
| Excited State 4:  | f=0.0277 | <S**2>=0.000 | 356.91nm | 3.4739eV | Singlet-A |
| Excited State 5:  | f=0.0001 | <S**2>=0.000 | 352.90nm | 3.5133eV | Singlet-A |
| Excited State 6:  | f=0.0083 | <S**2>=0.000 | 349.74nm | 3.5450eV | Singlet-A |
| Excited State 7:  | f=0.0404 | <S**2>=0.000 | 340.71nm | 3.6390eV | Singlet-A |
| Excited State 8:  | f=0.0059 | <S**2>=0.000 | 338.14nm | 3.6666eV | Singlet-A |
| Excited State 9:  | f=0.0024 | <S**2>=0.000 | 323.66nm | 3.8306eV | Singlet-A |
| Excited State 10: | f=0.0085 | <S**2>=0.000 | 319.94nm | 3.8753eV | Singlet-A |

|                  |          |              |          |          |           |
|------------------|----------|--------------|----------|----------|-----------|
| Excited State 1: | f=0.0000 | <S**2>=2.000 | 485.89nm | 2.5517eV | Triplet-A |
| Excited State 2: | f=0.0000 | <S**2>=2.000 | 479.78nm | 2.5842eV | Triplet-A |
| Excited State 3: | f=0.0000 | <S**2>=2.000 | 435.27nm | 2.8484eV | Triplet-A |
| Excited State 4: | f=0.0000 | <S**2>=2.000 | 419.79nm | 2.9535eV | Triplet-A |
| Excited State 5: | f=0.0000 | <S**2>=2.000 | 416.74nm | 2.9751eV | Triplet-A |
| Excited State 6: | f=0.0000 | <S**2>=2.000 | 412.88nm | 3.0029eV | Triplet-A |

|                   |          |              |          |          |           |
|-------------------|----------|--------------|----------|----------|-----------|
| Excited State 7:  | f=0.0000 | <S**2>=2.000 | 395.88nm | 3.1319eV | Triplet-A |
| Excited State 8:  | f=0.0000 | <S**2>=2.000 | 372.51nm | 3.3284eV | Triplet-A |
| Excited State 9:  | f=0.0000 | <S**2>=2.000 | 361.39nm | 3.4308eV | Triplet-A |
| Excited State 10: | f=0.0000 | <S**2>=2.000 | 360.04nm | 3.4437eV | Triplet-A |

### Pt-COOH

|                   |          |              |          |          |           |
|-------------------|----------|--------------|----------|----------|-----------|
| Excited State 1:  | f=0.0071 | <S**2>=0.000 | 427.70nm | 2.8989eV | Singlet-A |
| Excited State 2:  | f=0.0627 | <S**2>=0.000 | 395.81nm | 3.1324eV | Singlet-A |
| Excited State 3:  | f=0.0070 | <S**2>=0.000 | 389.17nm | 3.1859eV | Singlet-A |
| Excited State 4:  | f=0.0487 | <S**2>=0.000 | 372.28nm | 3.3304eV | Singlet-A |
| Excited State 5:  | f=0.0030 | <S**2>=0.000 | 357.24nm | 3.4706eV | Singlet-A |
| Excited State 6:  | f=0.0230 | <S**2>=0.000 | 348.04nm | 3.5624eV | Singlet-A |
| Excited State 7:  | f=0.0197 | <S**2>=0.000 | 336.34nm | 3.6862eV | Singlet-A |
| Excited State 8:  | f=0.0433 | <S**2>=0.000 | 333.50nm | 3.7176eV | Singlet-A |
| Excited State 9:  | f=0.0021 | <S**2>=0.000 | 327.36nm | 3.7874eV | Singlet-A |
| Excited State 10: | f=0.0002 | <S**2>=0.000 | 319.08nm | 3.8856eV | Singlet-A |

|                   |          |              |          |          |           |
|-------------------|----------|--------------|----------|----------|-----------|
| Excited State 1:  | f=0.0000 | <S**2>=2.000 | 517.73nm | 2.3948eV | Triplet-A |
| Excited State 2:  | f=0.0000 | <S**2>=2.000 | 488.91nm | 2.5359eV | Triplet-A |
| Excited State 3:  | f=0.0000 | <S**2>=2.000 | 434.23nm | 2.8553eV | Triplet-A |
| Excited State 4:  | f=0.0000 | <S**2>=2.000 | 427.58nm | 2.8997eV | Triplet-A |
| Excited State 5:  | f=0.0000 | <S**2>=2.000 | 411.92nm | 3.0099eV | Triplet-A |
| Excited State 6:  | f=0.0000 | <S**2>=2.000 | 402.17nm | 3.0828eV | Triplet-A |
| Excited State 7:  | f=0.0000 | <S**2>=2.000 | 390.37nm | 3.1760eV | Triplet-A |
| Excited State 8:  | f=0.0000 | <S**2>=2.000 | 387.49nm | 3.1997eV | Triplet-A |
| Excited State 9:  | f=0.0000 | <S**2>=2.000 | 365.57nm | 3.3916eV | Triplet-A |
| Excited State 10: | f=0.0000 | <S**2>=2.000 | 362.04nm | 3.4246eV | Triplet-A |

### Pt-COOH-2

|                   |          |              |          |          |           |
|-------------------|----------|--------------|----------|----------|-----------|
| Excited State 1:  | f=0.0102 | <S**2>=0.000 | 401.30nm | 3.0896eV | Singlet-A |
| Excited State 2:  | f=0.0046 | <S**2>=0.000 | 376.88nm | 3.2898eV | Singlet-A |
| Excited State 3:  | f=0.0454 | <S**2>=0.000 | 347.83nm | 3.5645eV | Singlet-A |
| Excited State 4:  | f=0.0047 | <S**2>=0.000 | 346.26nm | 3.5807eV | Singlet-A |
| Excited State 5:  | f=0.0039 | <S**2>=0.000 | 330.57nm | 3.7507eV | Singlet-A |
| Excited State 6:  | f=0.0512 | <S**2>=0.000 | 329.61nm | 3.7615eV | Singlet-A |
| Excited State 7:  | f=0.0044 | <S**2>=0.000 | 324.13nm | 3.8251eV | Singlet-A |
| Excited State 8:  | f=0.0003 | <S**2>=0.000 | 314.11nm | 3.9471eV | Singlet-A |
| Excited State 9:  | f=0.0156 | <S**2>=0.000 | 312.03nm | 3.9735eV | Singlet-A |
| Excited State 10: | f=0.0495 | <S**2>=0.000 | 309.23nm | 4.0094eV | Singlet-A |

|                  |          |              |          |          |           |
|------------------|----------|--------------|----------|----------|-----------|
| Excited State 1: | f=0.0000 | <S**2>=2.000 | 467.82nm | 2.6503eV | Triplet-A |
| Excited State 2: | f=0.0000 | <S**2>=2.000 | 460.21nm | 2.6941eV | Triplet-A |
| Excited State 3: | f=0.0000 | <S**2>=2.000 | 435.09nm | 2.8496eV | Triplet-A |
| Excited State 4: | f=0.0000 | <S**2>=2.000 | 407.80nm | 3.0403eV | Triplet-A |

|                   |          |                                  |          |          |           |
|-------------------|----------|----------------------------------|----------|----------|-----------|
| Excited State 5:  | f=0.0000 | $\langle S^{*2} \rangle = 2.000$ | 387.76nm | 3.1974eV | Triplet-A |
| Excited State 6:  | f=0.0000 | $\langle S^{*2} \rangle = 2.000$ | 366.00nm | 3.3876eV | Triplet-A |
| Excited State 7:  | f=0.0000 | $\langle S^{*2} \rangle = 2.000$ | 354.75nm | 3.4949eV | Triplet-A |
| Excited State 8:  | f=0.0000 | $\langle S^{*2} \rangle = 2.000$ | 350.01nm | 3.5423eV | Triplet-A |
| Excited State 9:  | f=0.0000 | $\langle S^{*2} \rangle = 2.000$ | 348.85nm | 3.5541eV | Triplet-A |
| Excited State 10: | f=0.0000 | $\langle S^{*2} \rangle = 2.000$ | 346.36nm | 3.5796eV | Triplet-A |
